# Supplementary material
Source: PubMed Central journal article supplement (PMC9008678)
Supplement: 520_2022_7052_MOESM1_ESM.pdf [file 520_2022_7052_MOESM1_ESM.pdf]

**Nurse-led telehealth interventions for symptom management in patients with cancer receiving systemic or radiation therapy: a systematic review and meta-analysis**

Journal: Supportive Care in Cancer

Chanel Kwok (co-lead) (ORCID 0000-0001-7621-7327)<sup>1,2</sup>, Charlena Degen (co-lead)<sup>2</sup>, Narges Moradi (ORCID 0000-0003-3713-6967)<sup>3</sup>, Dawn Stacey (ORCID 0000-0002-2681-741X)<sup>4</sup>

<sup>1</sup> Department of Medicine, University of Ottawa, Ottawa, Ontario, Canada

<sup>2</sup> School of Epidemiology and Public Health, Faculty of Medicine, University of Ottawa, Ottawa, Ontario, Canada

<sup>3</sup> School of Nursing, University of Ottawa, Ottawa, Ontario, Canada

<sup>4</sup> School of Nursing, University of Ottawa and Ottawa Hospital Research Institute, Ottawa, Ontario, Canada

Corresponding author contact information:

Dawn Stacey RN, PhD, FAAN, FCAHS, FCAN, CON(C)

[dstacey@uottawa.ca](mailto:dstacey@uottawa.ca)

## Online resource 1 - Search strategies and excluded studies

**Supplementary Table 1.1 - MEDLINE search strategy**

| <u>MEDLINE</u> | Date searched: March 10, 2021                              | Results |
|----------------|------------------------------------------------------------|---------|
|                | <b>CONCEPT 1: Cancer</b>                                   |         |
| 1              | exp Neoplasms/                                             | 3427923 |
| 2              | Cancer*.ti,ab.                                             | 1861693 |
| 3              | Carcinog*.ti,ab.                                           | 144556  |
| 4              | Malignanc*.ti,ab.                                          | 257630  |
| 5              | Neoplas*.ti,ab.                                            | 268653  |
| 6              | Oncolog*.ti,ab.                                            | 156454  |
| 7              | Tumor*.ti,ab.                                              | 1501221 |
| 8              | Tumour*.ti,ab.                                             | 277396  |
| 9              | or/1-8                                                     | 4438067 |
|                | <b>CONCEPT 2: Telemedicine</b>                             |         |
| 10             | Telemedicine/                                              | 26754   |
| 11             | teletherap*.ti,ab.                                         | 1372    |
| 12             | ehealth.ti,ab.                                             | 2935    |
| 13             | mhealth.ti,ab.                                             | 3498    |
| 14             | telehealth.ti,ab.                                          | 5465    |
| 15             | telemed*.ti,ab.                                            | 12971   |
| 16             | telephone/ or cell phone/ or text messaging/               | 23302   |
| 17             | Telephone*.ti,ab.                                          | 61188   |
| 18             | (cell* adj1 phone*).ti,ab.                                 | 3333    |
| 19             | (text adj1 messag*).ti,ab.                                 | 4546    |
| 20             | texting.ti,ab.                                             | 948     |
| 21             | SMS.ti,ab.                                                 | 6285    |
| 22             | Computers/                                                 | 50919   |
| 23             | computer*.ti,ab.                                           | 305753  |
| 24             | Computers, Handheld/                                       | 3731    |
| 25             | (digital adj1 assistant).ti,ab.                            | 589     |
| 26             | internet/ or internet-based intervention/ or social media/ | 83273   |
| 27             | internet.ti,ab.                                            | 54692   |
| 28             | (web* adj1 intervention*).ti,ab.                           | 251     |
| 29             | cyber*.ti,ab.                                              | 7552    |
| 30             | (world adj2 web).ti,ab.                                    | 3238    |
| 31             | social medi*.ti,ab.                                        | 16647   |
| 32             | twitter.ti,ab.                                             | 3682    |
| 33             | Mobile Applications/                                       | 7103    |
| 34             | mobile.ti,ab.                                              | 103691  |

|    |                               |             |
|----|-------------------------------|-------------|
| 35 | (software adj2 app*).ti,ab.   | 4737        |
| 36 | (electronic adj2 app*).ti,ab. | 3644        |
| 37 | (portable adj2 app*).ti,ab.   | 752         |
| 38 | Online Systems/               | 8422        |
| 39 | online.ti,ab.                 | 132307      |
| 40 | Remote Consultation/          | 5063        |
| 41 | remote.ti,ab.                 | 74068       |
| 42 | teleconsult*.ti,ab.           | 1402        |
| 43 | Smartphone/                   | 5399        |
| 44 | smartphone*.ti,ab.            | 13161       |
| 45 | Telecommunications/           | 4896        |
| 46 | telecomm*.ti,ab.              | 4574        |
| 47 | or/10-46                      | 832983      |
|    | <b>CONCEPT 3: Nursing</b>     |             |
| 48 | exp Nursing/                  | 254917      |
| 49 | nurses/ or nurse clinicians/  | 48212       |
| 50 | nurs*.ti,ab.                  | 466628      |
| 51 | or/48-50                      | 601521      |
| 52 | and/9,47,51                   | <b>2604</b> |

**Supplementary Table 1.2 - EMBASE search strategy**

| <u>EMBASE</u> | <b>Date searched: March 10, 2021</b> | <b>Results</b> |
|---------------|--------------------------------------|----------------|
|               | <b>CONCEPT 1: Cancer</b>             |                |
| <b>1</b>      | exp malignant neoplasm/              | 3855669        |
| <b>2</b>      | Cancer*.ti,ab.                       | 2712883        |
| <b>3</b>      | Carcinog*.ti,ab.                     | 187213         |
| <b>4</b>      | Malignanc*.ti,ab.                    | 410215         |
| <b>5</b>      | Neoplas*.ti,ab.                      | 389439         |
| <b>6</b>      | Oncolog*.ti,ab.                      | 295130         |
| <b>7</b>      | Tumor*.ti,ab.                        | 2112617        |
| <b>8</b>      | Tumour*.ti,ab.                       | 449711         |
| <b>9</b>      | or/1-8                               | 5653753        |
|               | <b>CONCEPT 2: Telemedicine</b>       |                |
| <b>10</b>     | telemedicine/ or teletherapy/        | 30648          |
| <b>11</b>     | telehearp*.ti,ab.                    | 1951           |
| <b>12</b>     | ehealth.ti,ab.                       | 3356           |
| <b>13</b>     | mhealth.ti,ab.                       | 3617           |
| <b>14</b>     | telehealth/                          | 8920           |
| <b>15</b>     | telehealth.ti,ab.                    | 6922           |
| <b>16</b>     | telemed*.ti,ab.                      | 17617          |
| <b>17</b>     | telephone/                           | 40350          |
| <b>18</b>     | mobile phone/                        | 17977          |
| <b>19</b>     | text messaging/                      | 5620           |
| <b>20</b>     | Telephone.ti,ab.                     | 87021          |
| <b>21</b>     | (cell* adj1 phone*).ti,ab.           | 4651           |
| <b>22</b>     | (text adj1 messag*).ti,ab.           | 6012           |
| <b>23</b>     | texting.ti,ab.                       | 1349           |
| <b>24</b>     | SMS.ti,ab.                           | 8471           |
| <b>25</b>     | computer/                            | 90033          |
| <b>26</b>     | computer*.ti,ab.                     | 391456         |
| <b>27</b>     | personal digital assistant/          | 1580           |
| <b>28</b>     | (digital adj1 assistant).ti,ab.      | <b>702</b>     |
| <b>29</b>     | internet/ or web-based intervention/ | 113192         |
| <b>30</b>     | internet.ti,ab.                      | 74555          |
| <b>31</b>     | (web* adj1 intervention*).ti,ab.     | 344            |
| <b>32</b>     | cyber*.ti,ab.                        | 10574          |
| <b>33</b>     | (world adj2 web).ti,ab.              | 3555           |
| <b>34</b>     | social media/                        | 25331          |
| <b>35</b>     | social medi*.ti,ab.                  | 22945          |

|    |                                                                                                                                             |             |
|----|---------------------------------------------------------------------------------------------------------------------------------------------|-------------|
| 36 | twitter.ti,ab.                                                                                                                              | 5137        |
| 37 | mobile application/ or mobile health application/                                                                                           | 14733       |
| 38 | mobile.ti,ab.                                                                                                                               | 142444      |
| 39 | (software adj2 app*).ti,ab.                                                                                                                 | 7162        |
| 40 | (electronic adj2 app*).ti,ab.                                                                                                               | 3882        |
| 41 | (portable adj2 app*).ti,ab.                                                                                                                 | 897         |
| 42 | online system/                                                                                                                              | 27080       |
| 43 | online.ti,ab.                                                                                                                               | 192183      |
| 44 | teleconsultation/                                                                                                                           | 10981       |
| 45 | remote.ti,ab.                                                                                                                               | 95633       |
| 46 | teleconsult*.ti,ab.                                                                                                                         | 1710        |
| 47 | smartphone/                                                                                                                                 | 15393       |
| 48 | smartphone*.ti,ab.                                                                                                                          | 17661       |
| 49 | telecommunication/                                                                                                                          | 26514       |
| 50 | telecomm*.ti,ab.                                                                                                                            | 4634        |
| 51 | or/10-50                                                                                                                                    | 1136582     |
|    | <b>CONCEPT 3: Nursing</b>                                                                                                                   |             |
| 52 | exp nursing/                                                                                                                                | 404742      |
| 53 | nurse/ or case manager/ or expert nurse/ or nurse consultant/ or nurse researcher/ or practical nurse/ or registered nurse/ or staff nurse/ | 144346      |
| 54 | nurs*.ti,ab.                                                                                                                                | 564582      |
| 55 | or/52-54                                                                                                                                    | 774081      |
| 56 | and/9,51,55                                                                                                                                 | <b>5169</b> |

**Supplementary Table 1.3 - CENTRAL search strategy**

| <u>CENTRAL</u> | Date searched: March 10, 2021  | Results |
|----------------|--------------------------------|---------|
|                | <b>CONCEPT 1: Cancer</b>       |         |
| 1              | exp Neoplasms/                 | 80924   |
| 2              | Cancer*.ti,ab.                 | 157317  |
| 3              | Carcinog*.ti,ab.               | 1535    |
| 4              | Malignanc*.ti,ab.              | 13014   |
| 5              | Neoplas*.ti,ab.                | 10583   |
| 6              | Oncolog*.ti,ab.                | 25271   |
| 7              | Tumor*.ti,ab.                  | 58336   |
| 8              | Tumour*.ti,ab.                 | 13330   |
| 9              | or/1-8                         | 225696  |
|                | <b>CONCEPT 2: Telemedicine</b> |         |
| 10             | Telemedicine/                  | 2258    |

|    |                                                  |       |
|----|--------------------------------------------------|-------|
| 11 | teletherap*.ti,ab.                               | 72    |
| 12 | ehealth.ti,ab.                                   | 601   |
| 13 | mhealth.ti,ab.                                   | 1235  |
| 14 | telehealth.ti,ab.                                | 1172  |
| 15 | telemed*.ti,ab.                                  | 1830  |
| 16 | telephone/ or cellular phone/ or text messaging/ | 2997  |
| 17 | Telephone.ti,ab.                                 | 20145 |
| 18 | (cell* adj1 phone*).ti,ab.                       | 789   |
| 19 | (text adj1 messag*).ti,ab.                       | 3679  |
| 20 | texting.ti,ab.                                   | 364   |
| 21 | SMS.ti,ab.                                       | 2163  |
| 22 | Computers/                                       | 548   |
| 23 | computer*.ti,ab.                                 | 33526 |
| 24 | Computers, Handheld/                             | 280   |
| 25 | (digital adj1 assistant).ti,ab.                  | 121   |
| 26 | internet/ or social media/                       | 4071  |
| 27 | internet.ti,ab.                                  | 9116  |
| 28 | (web* adj1 intervention*).ti,ab.                 | 460   |
| 29 | cyber*.ti,ab.                                    | 404   |
| 30 | (world adj2 web).ti,ab.                          | 74    |
| 31 | social medi*.ti,ab.                              | 1423  |
| 32 | twitter.ti,ab.                                   | 153   |
| 33 | mobile applications/                             | 730   |
| 34 | mobile.ti,ab.                                    | 9330  |
| 35 | (software adj2 app*).ti,ab.                      | 449   |
| 36 | (electronic adj2 app*).ti,ab.                    | 285   |
| 37 | (portable adj2 app*).ti,ab.                      | 73    |
| 38 | online systems/                                  | 160   |
| 39 | online.ti,ab.                                    | 15165 |
| 40 | Remote Consultation/                             | 379   |
| 41 | remote.ti,ab.                                    | 5658  |
| 42 | teleconsult*.ti,ab.                              | 130   |
| 43 | smartphone*.ti,ab.                               | 4015  |
| 44 | telecommunications/                              | 86    |
| 45 | telecomm*.ti,ab.                                 | 229   |
| 46 | or/10-45                                         | 91796 |
|    | <b>CONCEPT 3: Nursing</b>                        |       |
| 47 | exp nursing/                                     | 3309  |
| 48 | nurses/ or nurse clinicians/                     | 709   |
| 49 | nurs*.ti,ab.                                     | 39313 |

|           |             |              |
|-----------|-------------|--------------|
| <b>50</b> | or/47-49    | <b>40658</b> |
| <b>51</b> | and/9,46,50 | <b>964</b>   |

### Supplementary Table 1.4 - CINAHL search strategy

| <u>CINAHL</u> | Date searched: March 10, 2021                            | Results |
|---------------|----------------------------------------------------------|---------|
|               | <b>CONCEPT 1: Cancer</b>                                 |         |
| <b>S1</b>     | (MH "Neoplasms+")                                        | 569236  |
| <b>S2</b>     | TI Cancer* OR AB Cancer*                                 | 410978  |
| <b>S3</b>     | TI Carcinog* OR AB Carcinog*                             | 9108    |
| <b>S4</b>     | TI Malignanc* OR AB Malignanc*                           | 38520   |
| <b>S5</b>     | TI Neoplas* OR AB Neoplas*                               | 26969   |
| <b>S6</b>     | TI Oncolog* OR AB Oncolog*                               | 58286   |
| <b>S7</b>     | TI Tumor* OR AB Tumor*                                   | 152427  |
| <b>S8</b>     | TI Tumour* OR AB Tumour*                                 | 29877   |
| <b>S9</b>     | (S1 OR S2 OR S3 OR S4 OR S5 OR S6 OR S7 OR S8)           | 755275  |
|               | <b>CONCEPT 2: Telemedicine</b>                           |         |
| <b>S10</b>    | (MH "Telemedicine")                                      | 13032   |
| <b>S11</b>    | TI teletherap* OR AB teletherap*                         | 97      |
| <b>S12</b>    | TI ehealth OR AB ehealth                                 | 2307    |
| <b>S13</b>    | TI mhealth OR AB mhealth                                 | 1814    |
| <b>S14</b>    | (MH "Telehealth")                                        | 9913    |
| <b>S15</b>    | TI telehealth OR AB telehealth                           | 4682    |
| <b>S16</b>    | TI telemed* OR AB telemed*                               | 6131    |
| <b>S17</b>    | (MH "Telephone+")                                        | 24571   |
| <b>S18</b>    | TI Telephone* OR AB Telephone*                           | 30793   |
| <b>S19</b>    | TI (cell* N1 phone*) OR AB (cell* N1 phone*)             | 1820    |
| <b>S20</b>    | TI (text N1 messag*) OR AB (text N1 messag*)             | 2993    |
| <b>S21</b>    | TI texting OR AB texting                                 | 821     |
| <b>S22</b>    | TI SMS OR AB SMS                                         | 1613    |
| <b>S23</b>    | (MH "Computers, Portable+")                              | 8869    |
| <b>S24</b>    | TI computer* OR AB computer*                             | 64322   |
| <b>S25</b>    | TI (digital N1 assistant) OR AB (digital N1 assistant)   | 597     |
| <b>S26</b>    | (MH "Internet+")                                         | 155856  |
| <b>S27</b>    | TI internet OR AB internet                               | 32119   |
| <b>S28</b>    | TI (web* N1 intervention*) OR AB (web* N1 intervention*) | 972     |
| <b>S29</b>    | TI cyber* OR AB cyber*                                   | 4681    |
| <b>S30</b>    | TI (world N2 web) OR AB (world N2 web)                   | 1308    |
| <b>S31</b>    | TI social medi* OR AB social medi*                       | 24855   |

|     |                                                                                                                                                                                                                                                          |             |
|-----|----------------------------------------------------------------------------------------------------------------------------------------------------------------------------------------------------------------------------------------------------------|-------------|
| S32 | TI twitter OR AB twitter                                                                                                                                                                                                                                 | 3228        |
| S33 | (MH "Mobile Applications")                                                                                                                                                                                                                               | 8621        |
| S34 | TI mobile OR AB mobile                                                                                                                                                                                                                                   | 22328       |
| S35 | TI (software N2 app*) OR AB (software N2 app*)                                                                                                                                                                                                           | 1776        |
| S36 | TI (electronic N2 app*) OR AB (electronic N2 app*)                                                                                                                                                                                                       | 1040        |
| S37 | TI (portable N2 app*) OR AB (portable N2 app*)                                                                                                                                                                                                           | 118         |
| S38 | (MH "Online Systems")                                                                                                                                                                                                                                    | 1836        |
| S39 | TI online OR AB online                                                                                                                                                                                                                                   | 73638       |
| S40 | (MH "Remote Consultation")                                                                                                                                                                                                                               | 2374        |
| S41 | TI remote OR AB remote                                                                                                                                                                                                                                   | 15931       |
| S42 | TI teleconsult* OR AB teleconsult*                                                                                                                                                                                                                       | 488         |
| S43 | TI smartphone* OR AB smartphone*                                                                                                                                                                                                                         | 6502        |
| S44 | (MH "Telecommunications+")                                                                                                                                                                                                                               | 142392      |
| S45 | TI telecomm* OR AB telecomm*                                                                                                                                                                                                                             | 1222        |
| S46 | S10 OR S11 OR S12 OR S13 OR S14 OR S15 OR S16 OR S17 OR S18 OR S19 OR S20 OR S21 OR S22 OR S23 OR S24 OR S25 OR S26 OR S27 OR S28 OR S29 OR S30 OR S31 OR S32 OR S33 OR S34 OR S35 OR S36 OR S37 OR S38 OR S39 OR S40 OR S41 OR S42 OR S43 OR S44 OR S45 | 415150      |
|     | <b>CONCEPT 3: Nursing</b>                                                                                                                                                                                                                                |             |
| S47 | (MH "Nurses") OR (MH "Registered Nurses")                                                                                                                                                                                                                | 98967       |
| S48 | TI nurs* OR AB nurs*                                                                                                                                                                                                                                     | 547354      |
| S49 | S47 OR S48                                                                                                                                                                                                                                               | 584303      |
| S50 | S9 AND S46 AND S49                                                                                                                                                                                                                                       | <b>3305</b> |

**Supplementary Table 1.5 - PsychINFO search strategy**

| <u>PSYCINFO</u> | Date searched: March 10, 2021    | Results |
|-----------------|----------------------------------|---------|
|                 | <b>CONCEPT 1: Cancer</b>         |         |
| 1               | exp Neoplasms/                   | 53981   |
| 2               | Cancer*.ti,ab.                   | 63278   |
| 3               | Carcinog*.ti,ab.                 | 865     |
| 4               | Malignanc*.ti,ab.                | 2169    |
| 5               | Neoplas*.ti,ab.                  | 2229    |
| 6               | Oncolog*.ti,ab.                  | 9197    |
| 7               | Tumor*.ti,ab.                    | 15234   |
| 8               | Tumour*.ti,ab.                   | 2090    |
| 9               | or/1-8                           | 84536   |
|                 | <b>CONCEPT 2: Telemedicine</b>   |         |
| 10              | telemedicine/ or online therapy/ | 8382    |
| 11              | teletherap*.ti,ab.               | 87      |



|    |                                          |        |
|----|------------------------------------------|--------|
| 12 | ehealth.ti,ab.                           | 760    |
| 13 | mhealth.ti,ab.                           | 705    |
| 14 | telehealth.ti,ab.                        | 1584   |
| 15 | telemed*.ti,ab.                          | 1671   |
| 16 | Telephone Systems/                       | 2141   |
| 17 | mobile phones/                           | 4749   |
| 18 | text messaging/                          | 1080   |
| 19 | Telephone.ti,ab.                         | 24478  |
| 20 | (cell* adj1 phone*).ti,ab.               | 1952   |
| 21 | (text adj1 messag*).ti,ab.               | 2427   |
| 22 | texting.ti,ab.                           | 919    |
| 23 | SMS.ti,ab.                               | 1564   |
| 24 | Computers/                               | 10145  |
| 25 | computer*.ti,ab.                         | 91497  |
| 26 | (digital adj1 assistant).ti,ab.          | 225    |
| 27 | internet/                                | 29474  |
| 28 | digital interventions/                   | 542    |
| 29 | internet.ti,ab.                          | 39493  |
| 30 | (web* adj1 intervention*).ti,ab.         | 163    |
| 31 | cyber*.ti,ab.                            | 8959   |
| 32 | (world adj2 web).ti,ab.                  | 1597   |
| 33 | social media/ or online social networks/ | 15908  |
| 34 | social medi*.ti,ab.                      | 13210  |
| 35 | twitter.ti,ab.                           | 2957   |
| 36 | mobile devices/                          | 2649   |
| 37 | mobile applications/                     | 1108   |
| 38 | mobile.ti,ab.                            | 17555  |
| 39 | (software adj2 app*).ti,ab.              | 1102   |
| 40 | (electronic adj2 app*).ti,ab.            | 386    |
| 41 | (portable adj2 app*).ti,ab.              | 56     |
| 42 | online.ti,ab.                            | 88028  |
| 43 | remote.ti,ab.                            | 11325  |
| 44 | teleconsult*.ti,ab.                      | 183    |
| 45 | Smartphones/                             | 1870   |
| 46 | smartphone*.ti,ab.                       | 4361   |
| 47 | telecommunications media/                | 1452   |
| 48 | telecomm*.ti,ab.                         | 2345   |
| 49 | or/10-48                                 | 275214 |
|    | <b>CONCEPT 3: Nursing</b>                |        |
| 50 | nurses/                                  | 28140  |

|    |              |            |
|----|--------------|------------|
| 51 | nursing/     | 23351      |
| 52 | nurs*.ti,ab. | 102361     |
| 53 | or/50-52     | 104747     |
| 54 | and/9,49,53  | <b>560</b> |

### Supplementary Table 1.6 - clinicaltrials.gov search strategy

|                                     |
|-------------------------------------|
| Condition or disease: 'Cancer'      |
| Other terms: 'telehealth AND nurse' |
| Filters: Completed                  |
| Search results: 2 studies           |

### Supplementary Table 2. Excluded studies (N= 168)

| Study                    | Reason for exclusion          |
|--------------------------|-------------------------------|
| ACTRN12608000252314 2008 | Ineligible patient population |
| ACTRN12609000920291 2009 | Ineligible patient population |
| ACTRN12610000207011 2010 | Ineligible intervention       |
| ACTRN12611000186954 2011 | Trial protocol                |
| ACTRN12611000392965 2011 | Trial protocol                |
| ACTRN12611001137987 2011 | Abstract - insufficient data  |
| ACTRN12617000068369 2017 | Trial protocol                |
| ACTRN12617001211358 2017 | Trial protocol                |
| ACTRN12618001103257 2018 | Trial protocol                |
| ACTRN12620000332921 2020 | Trial protocol                |
| Adler 2019               | Ineligible study design       |
| Aliffi 2019              | Ineligible study design       |
| Anderson 2017            | Trial protocol                |
| Avci 2020                | Ineligible intervention       |
| Basch 2020               | Ineligible outcomes           |
| Bauer 2015               | Trial protocol                |
| Bauer 2015               | Abstract - insufficient data  |
| Beauplet 2019            | Ineligible patient population |
| Beaver 2006              | Ineligible patient population |
| Beaver 2009              | Abstract - insufficient data  |
| Beaver 2009              | Abstract - insufficient data  |
| Beaver 2012              | Ineligible patient population |
| Beaver 2017              | Ineligible patient population |
| Beck 2004                | Ineligible study design       |
| Becze 2008               | Ineligible study design       |
| Benteyn 2012             | Ineligible language           |
| Blum 2012                | Abstract - insufficient data  |
| Blum 2012                | Trial protocol                |
| Blum 2014                | Ineligible study design       |
| Bohnenkamp 2004          | Ineligible patient population |

|                             |                               |
|-----------------------------|-------------------------------|
| <b>Booker 2000</b>          | Ineligible study design       |
| <b>Borosund 2014</b>        | Ineligible intervention       |
| <b>Boucher 2002</b>         | Ineligible study design       |
| <b>Breen 2012</b>           | Trial protocol                |
| <b>Breen 2015</b>           | Trial protocol                |
| <b>Breen 2017</b>           | Ineligible study design       |
| <b>Brown 2002</b>           | Ineligible patient population |
| <b>CarneiroFran√Ba 2019</b> | Ineligible intervention       |
| <b>Chan 2014</b>            | Ineligible study design       |
| <b>Chang 2013</b>           | Ineligible study design       |
| <b>Chee 2017</b>            | Ineligible patient population |
| <b>ChenY-J 2014</b>         | Abstract - insufficient data  |
| <b>ChoiYoo 2014</b>         | Ineligible patient population |
| <b>Chung 2008</b>           | Ineligible intervention       |
| <b>CInar 2019</b>           | Ineligible intervention       |
| <b>Clarke 2020</b>          | Ineligible intervention       |
| <b>Coolbrandt 2017</b>      | Abstract - insufficient data  |
| <b>Cox 2008</b>             | Ineligible study design       |
| <b>Cox 2016</b>             | Abstract - insufficient data  |
| <b>Craddock 1999</b>        | Ineligible outcomes           |
| <b>Craven 2013</b>          | Ineligible outcomes           |
| <b>Daly 2020</b>            | Ineligible study design       |
| <b>Despiau 2015</b>         | Abstract - insufficient data  |
| <b>Dixon 2018</b>           | Ineligible patient population |
| <b>Donovan 2014</b>         | Ineligible comparator         |
| <b>Donovan 2017</b>         | Abstract - insufficient data  |
| <b>Downe-Wamboldt 2007</b>  | Ineligible intervention       |
| <b>DRKS00004826 2013</b>    | Trial protocol                |
| <b>Duflot-Boukobza 2020</b> | Abstract - insufficient data  |
| <b>Dunson 2013</b>          | Abstract - insufficient data  |
| <b>Elves 2018</b>           | Abstract - insufficient data  |
| <b>Faithfull 2001</b>       | Ineligible study design       |
| <b>Ferrua 2019</b>          | Abstract - insufficient data  |
| <b>Flannery 2015</b>        | Abstract - insufficient data  |
| <b>Flannery 2018</b>        | Ineligible intervention       |
| <b>Giesler 2005</b>         | Ineligible intervention       |
| <b>Girgis 2019</b>          | Abstract - insufficient data  |
| <b>Girgis 2020</b>          | Abstract - insufficient data  |
| <b>Given 2006</b>           | Ineligible intervention       |
| <b>Given 2010</b>           | Ineligible intervention       |
| <b>Gruenewald 2013</b>      | Abstract - insufficient data  |
| <b>Gustavell 2019</b>       | Ineligible patient population |
| <b>Haas 2016</b>            | Abstract - insufficient data  |
| <b>Hagopian 1990</b>        | Ineligible intervention       |
| <b>He 2018</b>              | Ineligible comparator         |

|                            |                               |
|----------------------------|-------------------------------|
| <b>Howell 2020</b>         | Abstract - insufficient data  |
| <b>Hoyer 2011</b>          | Ineligible outcomes           |
| <b>Huang 2020</b>          | Abstract - insufficient data  |
| <b>ISRCTN00735390 2011</b> | Trial protocol                |
| <b>ISRCTN45565436 2015</b> | Trial protocol                |
| <b>ISRCTN75220876 2011</b> | Trial protocol                |
| <b>ISRCTN84528758 2007</b> | Trial protocol                |
| <b>Johns 2011</b>          | Ineligible outcomes           |
| <b>Kabasawa 2015</b>       | Ineligible intervention       |
| <b>Kim 2007</b>            | Ineligible language           |
| <b>Kim 2013</b>            | Ineligible comparator         |
| <b>Kimman 2011</b>         | Ineligible patient population |
| <b>Kimman 2011</b>         | Ineligible study design       |
| <b>Knegtmans 2018</b>      | Abstract - insufficient data  |
| <b>Knegtmans 2020</b>      | Ineligible intervention       |
| <b>Kolb 2015</b>           | Ineligible outcomes           |
| <b>Kroenke 2010</b>        | Ineligible study design       |
| <b>Krzyzanowska 2019</b>   | Ineligible study design       |
| <b>Krzyzanowska 2020</b>   | Abstract - insufficient data  |
| <b>Larsen 2008</b>         | Ineligible study design       |
| <b>Li 2014</b>             | Ineligible intervention       |
| <b>Li 2017</b>             | Ineligible outcomes           |
| <b>Maguire 2008</b>        | Ineligible intervention       |
| <b>Martin 2006</b>         | Ineligible study design       |
| <b>McCann 2009</b>         | Ineligible outcomes           |
| <b>Minvielle 2019</b>      | Abstract - insufficient data  |
| <b>Mir 2020</b>            | Abstract - insufficient data  |
| <b>Mkanta 2007</b>         | Ineligible study design       |
| <b>Mooney 2012</b>         | Abstract - insufficient data  |
| <b>Mooney 2012</b>         | Ineligible outcomes           |
| <b>Mooney 2012</b>         | Abstract - insufficient data  |
| <b>Mooney 2014</b>         | Ineligible intervention       |
| <b>Mooney 2015</b>         | Abstract - insufficient data  |
| <b>Mooney 2016</b>         | Abstract - insufficient data  |
| <b>Morrison 2018</b>       | Ineligible patient population |
| <b>MuneraGarces 2007</b>   | Ineligible study design       |
| <b>Narsavage 2013</b>      | Abstract - insufficient data  |
| <b>NCT00799084 2008</b>    | Trial protocol                |
| <b>NCT01684696 2012</b>    | Trial protocol                |
| <b>NCT01883986 2013</b>    | Trial protocol                |
| <b>NCT01979146 2013</b>    | Trial protocol                |
| <b>NCT01993901 2013</b>    | Trial protocol                |
| <b>NCT02238951 2014</b>    | Ineligible study design       |
| <b>NCT02483416 2015</b>    | Trial protocol                |
| <b>NCT02564666 2015</b>    | Trial protocol                |

|                             |                               |
|-----------------------------|-------------------------------|
| <b>NCT02707471 2016</b>     | Trial protocol                |
| <b>NCT02713919 2016</b>     | Trial protocol                |
| <b>NCT02828462 2016</b>     | Trial protocol                |
| <b>NCT03007953 2017</b>     | Trial protocol                |
| <b>NCT03205579 2017</b>     | Ineligible intervention       |
| <b>NCT03335189 2017</b>     | Trial protocol                |
| <b>NCT03413865 2018</b>     | Trial protocol                |
| <b>NCT03608410 2018</b>     | Trial protocol                |
| <b>NCT03623490 2018</b>     | Trial protocol                |
| <b>NCT04428905 2020</b>     | Still Recruiting              |
| <b>NTR2739 2011</b>         | Trial protocol                |
| <b>NTR3771 2013</b>         | Ineligible patient population |
| <b>NTR613 2006</b>          | Trial protocol                |
| <b>Oakley 2011</b>          | Abstract - insufficient data  |
| <b>Park 2018</b>            | Ineligible intervention       |
| <b>Pereira-Salgado 2017</b> | Ineligible study design       |
| <b>Quenel-Tueux 2019</b>    | Abstract - insufficient data  |
| <b>Rawl 2002</b>            | Ineligible intervention       |
| <b>Ream 2009</b>            | Ineligible intervention       |
| <b>Ream 2017</b>            | Abstract - insufficient data  |
| <b>Ruland 2010</b>          | Ineligible study design       |
| <b>Ruland 2013</b>          | Ineligible outcomes           |
| <b>Ruland 2013</b>          | Ineligible intervention       |
| <b>Samarel 2002</b>         | Ineligible intervention       |
| <b>Sardell 2000</b>         | Ineligible study design       |
| <b>Schuldheis 2001</b>      | Abstract - insufficient data  |
| <b>Sikorskii 2007</b>       | Ineligible intervention       |
| <b>Smits 2015</b>           | Ineligible study design       |
| <b>Spoelstra 2013</b>       | Ineligible comparator         |
| <b>Spoelstra 2015</b>       | Ineligible outcomes           |
| <b>Stacey 2012</b>          | Trial protocol                |
| <b>Stamm 2018</b>           | Ineligible intervention       |
| <b>Stanciu 2019</b>         | Ineligible intervention       |
| <b>Stevenson 2020</b>       | Ineligible intervention       |
| <b>Strasser 2016</b>        | Ineligible intervention       |
| <b>TeBoveldt 2012</b>       | Abstract - insufficient data  |
| <b>Terstriep 2019</b>       | Abstract - insufficient data  |
| <b>Underhill 2015</b>       | Ineligible study design       |
| <b>WANGWen 2019</b>         | Ineligible language           |
| <b>Weaver 2007</b>          | Ineligible study design       |
| <b>Wheelock 2012</b>        | Abstract - insufficient data  |
| <b>Wheelock 2012</b>        | Abstract - insufficient data  |
| <b>Wheelock 2015</b>        | Ineligible patient population |
| <b>Wright 2006</b>          | Ineligible study design       |
| <b>Ysebaert 2019</b>        | Ineligible intervention       |

---

|                     |                              |
|---------------------|------------------------------|
| <b>Yu-Hong 2016</b> | Abstract - insufficient data |
| <b>Zhang 2018</b>   | Ineligible intervention      |
| <b>Zhou 2020</b>    | Ineligible intervention      |

---
